# Supplementary material for: Short-term consumption of a high-fat diet increases host susceptibility to Listeria monocytogenes infection
Source: PubMed Central journal article supplement (PMC6339339; doi:10.1186/s40168-019-0621-x), 2019-01-18
Supplement: 40168_2019_621_MOESM1_ESM.pdf [file 40168_2019_621_MOESM1_ESM.pdf]

## Supplemental data, Las Heras et al Fig S1.

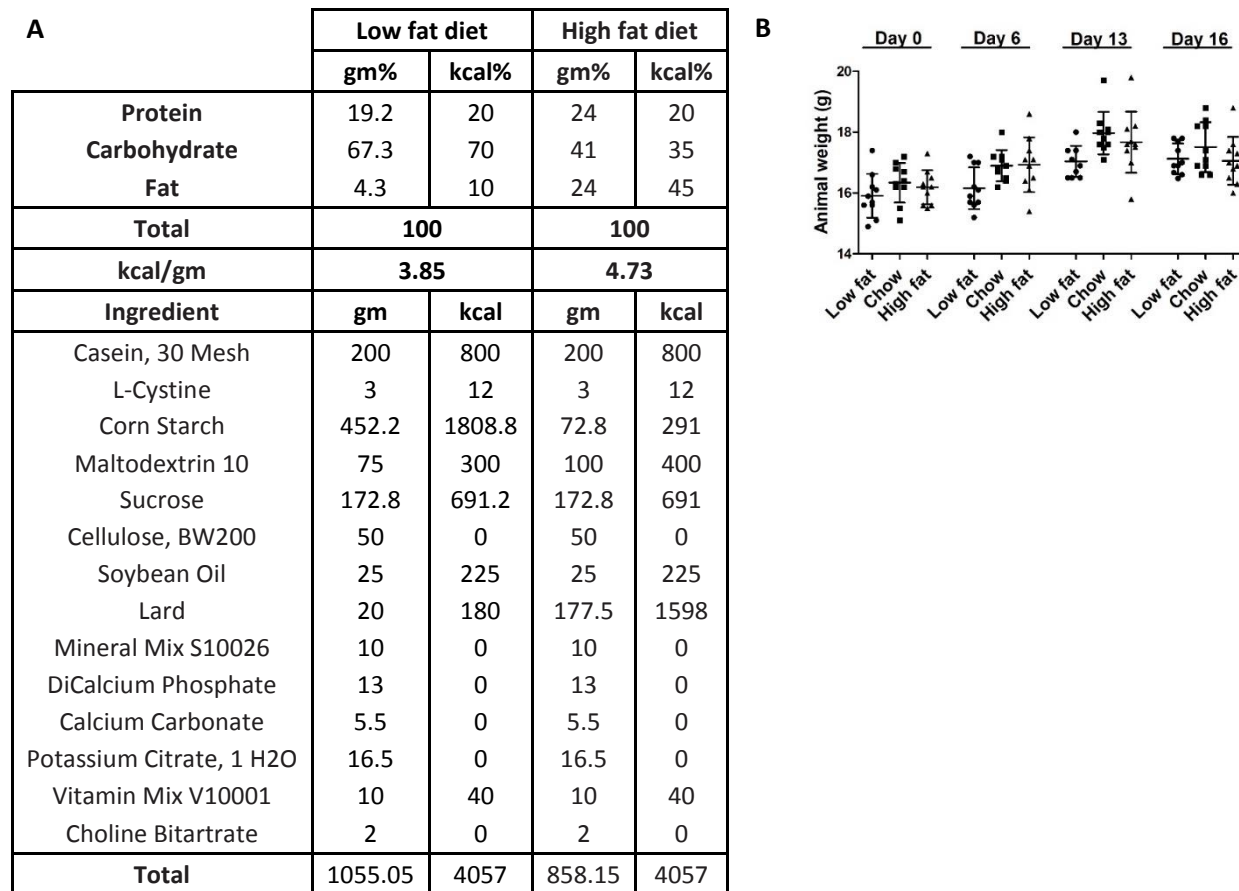

**Figure S1. Diet composition and murine weights prior to oral infection. A.** Composition of experimental diets. **B.** Variation of animal weight over time with dietary change. Statistical analysis was conducted using One way ANOVA and Tukey's Multiple Comparison Test.
