# Supplementary material for: Short-term consumption of a high-fat diet increases host susceptibility to Listeria monocytogenes infection
Source: PubMed Central journal article supplement (PMC6339339; doi:10.1186/s40168-019-0621-x), 2019-01-18
Supplement: 40168_2019_621_MOESM2_ESM.pdf [file 40168_2019_621_MOESM2_ESM.pdf]

Supplemental data, Las Heras et al Fig S2.

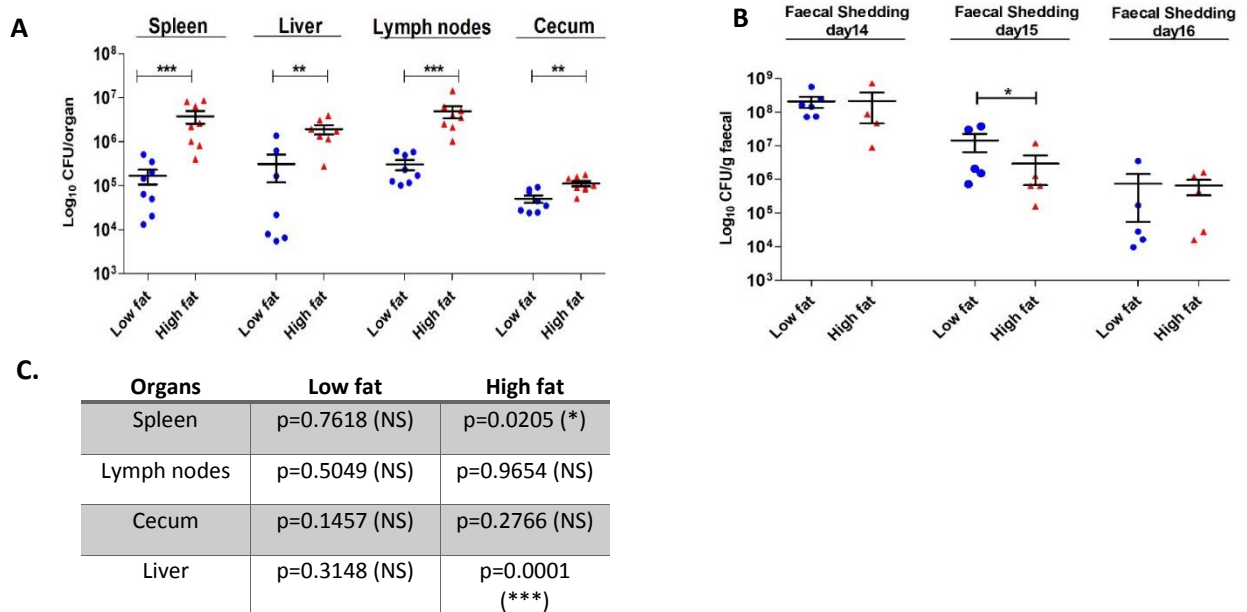

**Figure S2. Increased dietary fat from animal source increases host susceptibility to oral infection with *Listeria monocytogenes* EDGe<sup>m</sup> pIKM2.** IG inoculation of seven-week-old female C57BL/6 mice (ENVIGO, UK) was repeated in a separate duplicate experiment (n=8) using a 200µl inoculum comprising  $2.8 \times 10^9$  CFU *L. monocytogenes* EGDm::*pIMK2lux*, a bioluminescent murinized strain. After infection (three days), the faecal pellets were collected daily and plated for CFU to determine shedding of *L. monocytogenes*. **A.** Bacterial burden of spleen, liver, lymph nodes and of C57BL/6 mice fed with diets varying in percentage of fat content from the total caloric intake (n=8, standard deviation from the mean, statistical analysis was conducted using Mann Whitney Nonparametric Test). **B.** *Listeria monocytogenes* bacterial shedding per gram of faecal sample in each day after infection. **C.** Comparison between the two trials (EGDe<sup>m</sup> and pIKM2). Mann Whitney Nonparametric Test.
