# Supplementary material for: Short-term consumption of a high-fat diet increases host susceptibility to Listeria monocytogenes infection
Source: PubMed Central journal article supplement (PMC6339339; doi:10.1186/s40168-019-0621-x), 2019-01-18
Supplement: 40168_2019_621_MOESM3_ESM.pdf [file 40168_2019_621_MOESM3_ESM.pdf]

Supplemental data, Las Heras et al Fig S3.

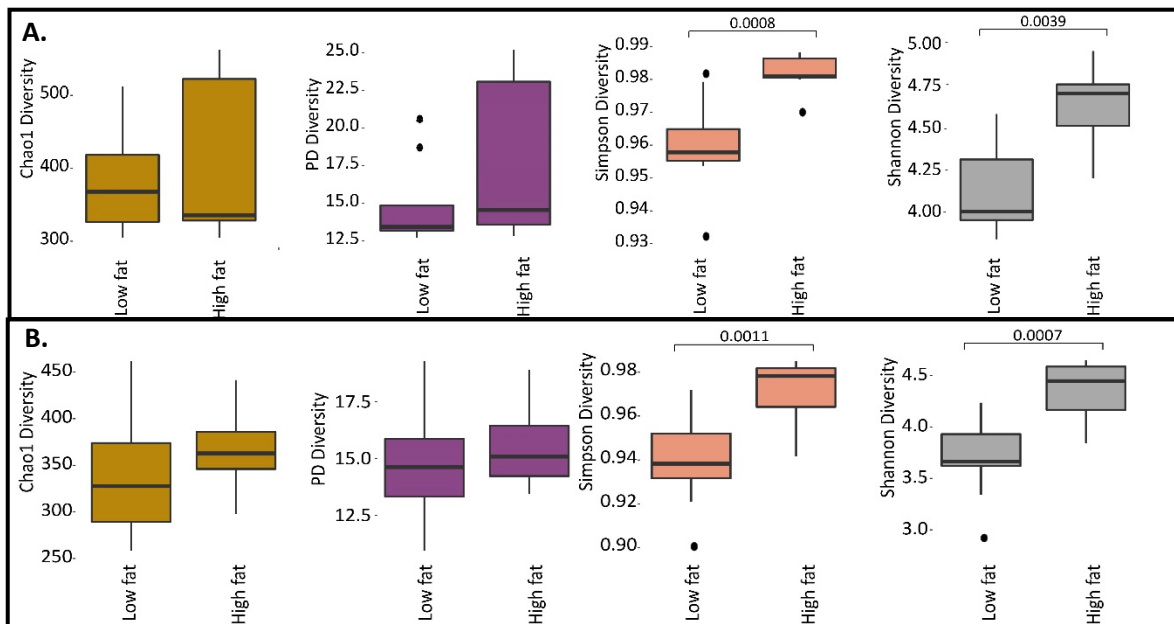

**Figure S3. Assessment of diversity within the sample (Alpha diversity) in the groups fed high-fat or low-fat diets.** Chao1 as a measurement of sample coverage. PD (phylogenetic diversity) used to consider affiliation between taxa within diversity. Simpson and Shannon used as an estimation of richness and evenness respectively. **A.** Changes in intestinal microbiota communities caused by short-term increased dietary fat (D0 to D13). **B.** Changes in intestinal microbiota communities upon infection with *L. monocytogenes*, modulated by short-term increased dietary fat (D13 to D16).
