# Supplementary material for: Short-term consumption of a high-fat diet increases host susceptibility to Listeria monocytogenes infection
Source: PubMed Central journal article supplement (PMC6339339; doi:10.1186/s40168-019-0621-x), 2019-01-18
Supplement: 40168_2019_621_MOESM7_ESM.pdf [file 40168_2019_621_MOESM7_ESM.pdf]

## Supplemental data, Las Heras et al *Table S1*.

Supplementary Table S1. Transcriptome analysis primer sets:

| Gene                  |                       |                    | Forward primer (left)     | Reverse primer (right)   | Probe |
|-----------------------|-----------------------|--------------------|---------------------------|--------------------------|-------|
| House Keeping (Ileum) | B-actin               | <i>Actb</i>        | aaggccaaccgtgaaaagat      | gtggtacgaccagaggcatac    | #56   |
|                       | Rib-S18               | <i>Rps18</i>       | aagcagacatcgacctcacc      | ggaaccagctctgggatcttg    | #88   |
| House Keeping (Liver) | Trypsin inhibitor     | <i>Itih4</i>       | ccctggacctctcttg          | agcaggatattgtgctgcaa     | #21   |
|                       | microglobulin/bikunin | <i>ambp</i>        | ccactaataactgggacctca     | ggggcctctgagtaattga      | #51   |
| Host cell invasion    | Ecad                  | <i>Cdh1</i>        | atcctcgccctgctgatt        | accaccgttctcctcgta       | #18   |
|                       | Met                   | <i>Ryk</i>         | ggcatgcaaagtccaagg        | catgcccatagccacaaagt     | #33   |
|                       | GP96                  | <i>Grp94</i>       | aatgaggagttaacggtaagatt   | ttctacaccctgtctgtg       | #62   |
|                       | <i>gC1qR</i>          | <i>C1qbp</i>       | aggaggagccctcacagg        | cacaaagttgggagttgatgct   | #92   |
|                       | RAB10                 | <i>Rab10</i>       | gaaaaggcgttctcacatt       | tgggttctttacaggggtct     | #88   |
|                       | mNcad                 | <i>Cdh2</i>        | gccatcatcgctatccttct      | ccgttcatccataccacaaa     | #18   |
| Permeability          | ZO-1                  | <i>Tjp1</i>        | gagcctgctaagccagtcc       | cagcatcagtttcgggtttt     | #21   |
|                       | ZO-2                  | <i>Tjp2</i>        | tcatcaaagaaatgaccagaaca   | tctcagtaacagtgccgttga    | #49   |
|                       | ZO-3                  | <i>Tjp3</i>        | aggccgtgcagtttctgt        | gcgagactggaccatcttct     | #16   |
|                       | Occludin              | <i>Ocln</i>        | ggctctacgtggatcaatatttga  | aaccccaggacaatggcta      | #79   |
|                       | claudins              | <i>Ocl1</i>        | cccttgacccccatcaat        | acacctcccagaaggcaga      | #20   |
| Immune response       | TNF- $\alpha$         | <i>TNFg</i>        | tcttctattcctgcttgg        | ggctgggcatagaactga       | #49   |
|                       | IL1- $\beta$          | <i>IL1b</i>        | ttgacggaccccaaaagat       | agctggatgctctcatcagg     | #38   |
|                       | IL17A                 | <i>IL17a</i>       | gattttcagcaaggaatgtgg     | cattgtggagggcagacaat     | #34   |
|                       | IL23                  | <i>IL23</i>        | tcctactaggactcagccaac     | tgggcatctgttgggtct       | #19   |
|                       | INF- $\gamma$         | <i>Infg</i>        | atctggaggaactggcaaaa      | ttcaagactcaagagtctgaggta | #21   |
|                       | FoxP3                 | <i>Foxp3</i>       | tcaggagcccaccagtaca       | tctgaaggcagagtcaggaga    | #78   |
|                       | IL10                  | <i>IL10</i>        | cagagccacatgctcctaga      | gtccagctggtcctttgttt     | #41   |
|                       | IL6                   | <i>IL6</i>         | gctaccaaactggatataatcagga | ccaggtagctatggtactccagaa | #6    |
|                       | Reg3- $\gamma$        | <i>Reg3g</i>       | accatcaccatcatgtcctg      | ggcatcttcttggaactt       | #108  |
|                       | pIK3-ap1              | <i>Pik3r1</i>      | gacggcactttccttgctc       | tgacttcgccgtctaccac      | #80   |
|                       | Ccl2                  | <i>Ccl2</i>        | catccacgtgttggctca        | gatcatcttctggtgaatgag    | #62   |
|                       | iNOS                  | <i>Impdh2</i>      | tcttacgtgccggacgac        | cccaggaagaatgagaaaatcat  | #100  |
| Muc2                  | <i>Muc2</i>           | gcagccacagatcccaaa | gttggggtcccctgaagt        | #33                      |       |

Primers for host transcriptome analysis. Designed in the Assay Design Center from Roche *Universal ProbeLibrary* (version 2.52, 2016).
